1           **Transcriptomic changes due to early, chronic alcohol exposure during cortical**  
2   **development implicate regionalization, cell-type specification, synaptogenesis and WNT**  
3           **signaling as primary determinants of fetal alcohol Spectrum Disorders**

4    *Máté Fischer<sup>1</sup> B.A., Praveen Chander<sup>1</sup> Ph.D., Huining Kang<sup>1</sup> Ph.D., Jason P. Weick<sup>1,2</sup> Ph.D.*

5

6

<sup>1</sup>Department of Neurosciences

7

<sup>2</sup>Center for Brain Recovery and Repair

8

University of New Mexico HSC

9

Albuquerque, NM 87131, USA.

10

11   \*Corresponding Author:

12   Jason. P. Weick, PhD

13   Department of Neurosciences

14   University of New Mexico-Health Science Center

15   145 Reginald Heber Fitz Hall

16   915 Camino de Salud NE

17   Albuquerque, NM 87131

18   Email: [jpweick@salud.unm.edu](mailto:jpweick@salud.unm.edu)

19

20   Keywords: Regionalization, patterning, WNT signaling, FASD, hPSN

21   The authors do not declare any conflicts of interest.

22 **Abstract**

23 Fetal alcohol spectrum disorders (FASD) are described by a cluster of deficits following *in*  
24 *utero* alcohol exposure, whose effects disproportionately target the cerebral cortex. *In vitro* and *in*  
25 *vivo* models of FASD have successfully recapitulated multiple facets of clinical presentations,  
26 including morphological and behavioral deficits, but far less is understood regarding the molecular  
27 and genetic bases of FASD. In this study, we utilize an *in vitro* human pluripotent stem cell-based  
28 (hPSC) model of corticogenesis to probe the effect of early, chronic alcohol exposure on the  
29 transcriptome of developing cortical neurons. We here identify a relatively limited number of  
30 significantly altered biological pathways, including regional patterning, cell-type specification,  
31 axon guidance and synaptic function. Significant upregulation of WNT signaling-related  
32 transcripts, to the exclusion of other secreted morphogens was also observed in alcohol exposed  
33 cultures. Lastly, an overall alcohol-associated shift towards an increased caudal profile, at the  
34 expense of rostral molecular identity was observed, representing a potentially previously  
35 underappreciated FASD phenotype.

36

## 37 **Introduction**

38 Fetal alcohol spectrum disorders (FASD) refer to a cluster of physical and mental  
39 symptoms affecting a person exposed to alcohol during gestation. FASD is an umbrella term that  
40 encompasses fetal alcohol syndrome (FAS), partial FAS, alcohol related neurodevelopmental  
41 disorder (ARND) and alcohol related birth defects (ARBD) (Kodituwakku 2007). According to  
42 estimates from the CDC, accidental and intentional drinking during pregnancy affects  
43 approximately 1.5% of the world population, and the added cost of care for individuals with FASD  
44 in the U.S. is estimated at \$2 million over the course of their lifetime (Popova 2017). FASD can  
45 present with a large variety of severity of symptoms, from relatively mild perturbations to adaptive  
46 learning, attention, executive function, social cognition and craniofacial morphogenesis, to  
47 severely debilitating disabilities (Lange 2017). Abstinence from alcohol during pregnancy can  
48 completely prevent the development of the disorder, but as many women do not discover they  
49 are pregnant for several weeks after conception, it is critical to understand the types of  
50 neurological insults that can occur before that time (CDC 2009).

51 The onset of neurogenesis in the cerebral cortex occurs during the first trimester in  
52 humans and injury during this period can result in various cortical malformations. The cerebral  
53 cortex is thought to be the major target of prenatal alcohol exposure (PAE), as many of the social,  
54 affective and cognitive deficits exhibited by children with FASD are mediated by cortical regions.  
55 Various research models of PAE have confirmed that alcohol produces significant alterations in  
56 cortical development at the gross morphological, cellular, and subcellular levels (Granato 2018).  
57 Impaired proliferation of radial glial cells in response to alcohol exposure has been shown to  
58 underlie a reduction of neurogenesis at high doses (70-100 mM), but appears to be less affected  
59 at doses  $\leq 50$ mM (Zecevic 2012; Larsen 2016). Human pluripotent stem cell-derived neurons  
60 (hPSN) have been demonstrated to recapitulate multiple aspects of *in utero* neuronal patterning  
61 and specification, making them an ideal model system for investigation of such early

62 developmental questions (Erceg 2009, Zhang 2010, Studer 2017). Critically, default differentiation  
63 without the addition of patterning morphogens produces cerebral cortical neurons on a  
64 physiologically-relevant time scale (Vanderhaeghen 2015). Similar, more targeted studies have  
65 previous come to a wide variety of conclusions concerning the effects of alcohol on proliferation,  
66 cell type specification, as well as synaptogenesis, although depending on the cell lines and dosing  
67 paradigm employed, these results can often be contradictory (Yang 2012, Leigland 2013, Treit  
68 2014).

69         Using qPCR-based RNA analysis, our lab has previously demonstrated that chronic 50mM  
70 alcohol exposure to developing hPSNs leads to significant alterations in a number of mRNAs  
71 associated with ventral forebrain patterning and GABAergic neuron specification (Larsen 2016).  
72 However, this was not accompanied by overall changes to the number of GABAergic interneurons  
73 generated, nor was a functional excitatory-inhibitory (E/I) imbalance uncovered. Thus, to probe  
74 for potential compensatory mechanisms and/or other mechanistic underpinnings of FASD-  
75 associated neurodevelopmental deficits, we used bulk RNA-sequencing to determine how alcohol  
76 affects RNA expression at the transcriptome level. These current data support previous findings  
77 concerning targeted downregulation of transcripts related to GABAergic patterning and  
78 excitatory/inhibitory balance. Additionally, we report significant perturbation to transcripts  
79 associated with WNT signaling and cortical regionalization, leading to an overall more caudal  
80 forebrain signature with alcohol exposure.

81

## 82 **Results**

### 83 **Differentiation of Human Neurons and Global Transcriptomic Findings**

84 Figure 1A demonstrates the developmental timeline of neuronal differentiation from  
85 hPSCs to functional cortical neurons. To generate mixed cortical cultures we employed a modified  
86 default differentiation paradigm using the serum-free embryoid body (SFEB) that results in an  
87 >95% Pax6<sup>+</sup> population of forebrain neuroectoderm following 10 days of differentiation, and  
88 functional post-mitotic neurons by 7 weeks of differentiation similar to *in vivo* human cortex (Zhang  
89 2001, Lavaute 2009, Weick 2011 and 2016). Without the application of exogenous morphogens  
90 the H9 cell line produces cortical a mixed culture comprised of glutamatergic projection and  
91 GABAergic interneurons as well as neural progenitor cells, all with a primarily cortical pattern of  
92 gene expression (Floruta 2017, Nadadhur 2018). To determine the effect of alcohol on neuronal  
93 specification and patterning we applied 50mM alcohol daily throughout the differentiation protocol  
94 similar to previous reports (Larson 2016), which was meant to mimic an early exposure during  
95 the periods of gastrulation and neurulation similar to *in utero* first-trimester chronic binge  
96 exposures (Okada 2009, Vaccarino 2012).

97 Gene-level data was compared for three biological replicates per treatment group and a  
98 DE gene list was assembled based on cutoff values for 1.2-fold change and statistical significance  
99 (adjusted p-value<0.05). After these filters were applied, 691 mRNA transcripts were revealed to  
100 be significantly altered between untreated and alcohol-treated cells at day 50 (Fig. 1B). Unbiased  
101 hierarchical clustering of DE genes by treatment group (Fig. 1B) demonstrates that alcohol  
102 exposure led to robust and highly reproducible patterns of change in the expression of these  
103 transcripts across the three replicates. Interestingly, alcohol had an overall positive impact on  
104 mRNA expression similar to previous reports (Qin 2017), with 477 transcripts upregulated  
105 compared to just 214 downregulated. Splicing analysis was performed for all DE mRNAs, which  
106 revealed changes to both major and minor species. While several mRNAs showed significant

107 alternative splicing of major isoforms in complementary directions, the majority were altered  
108 uniformly across isoforms (Supplemental Figure 1; Table1). The asymmetrical effect favoring  
109 expression increases is illustrated by volcano plot (Fig. 1C), which also highlights the most  
110 differentially expressed (DE) gene transcripts, including a dramatic upregulation of WNT co-  
111 agonists R-spondin family members (RSPO1-3) as well as WNT8. In contrast, multiple GABAergic  
112 interneuron-related transcripts including DLX1, GAD1, and somatostatin (SST) as well as the  
113 WNT receptor FZD5 constitute some of the most significantly downregulated transcripts (Fig. 1C).

### 114 **Canonical Signaling Pathways Altered with alcohol Exposure**

115 To gain insight into whether alcohol selectively altered the expression of genes with  
116 common biological motifs, the list of DE transcripts was first analyzed using DAVID, a NIH-  
117 supported suite of bioinformatic tools (v6.8; Huang 2009). Functional annotation of DE transcripts  
118 utilizing the gene ontology (GO) algorithm identified significant categories of enrichment  
119 (Supplemental Table 2). Some of the most selectively enriched GO categories are listed in Figure  
120 2A and seem to revolve around patterning of the cortical protomap, such as “rostral/caudal axon  
121 guidance,” “forebrain rostral/caudal pattern specification” as well as “cerebral cortex  
122 regionalization” (Fig. 2A). In addition to regional specifiers, abnormalities in neuronal cell fate  
123 decisions were highlighted with the emergence of categories such as “commitment of neuronal  
124 cell to specific neuron type in forebrain” and “cerebral cortex GABAergic interneuron  
125 differentiation.” Taken together, these findings highlight previous changes observed that point to  
126 alterations in excitatory/inhibitory (E/I) cell patterning, but also implicate more global alterations  
127 to cortical regionalization.

128 The Kyoto Encyclopedia of Genes and Genomes (KEGG) analysis tool supported by the  
129 Kanehisa Laboratory in Japan relies on analysis of pathways rather than ontology terms  
130 (Kanehisa 2019). “Axon guidance,” “WNT signaling” and “GABAergic synapse” again feature  
131 prominently among the results, providing support for the GO outputs. Additionally, “signaling

132 pathways regulating pluripotency of stem cells” and “alcoholism” were also identified, implicating  
133 alcohol exposure-derived dysregulation of stem cell differentiation. Lastly, we took advantage of  
134 Ingenuity Pathway Analysis (IPA; Qiagen) to further contextualize the changes reported in the DE  
135 gene lists with another orthogonal algorithm. These analyses augment the GO and KEGG  
136 findings, as the IPA database is manually curated and based on peer-reviewed literature rather  
137 than high-throughput, *in silico* data-mining (Kramer 2014). According to IPA’s analysis of the  
138 significantly enriched pathways, the most altered categories included WNT signaling, GABA  
139 receptor signaling, synaptogenesis and transcriptional regulation of stem cells (Fig. 2C,  
140 Supplemental Table 4). In addition to pathway analyses, IPA enables users to identify potential  
141 upstream transcriptional regulators of DE genes as well as whether those transcription factors  
142 show up or downregulation in the given dataset. Interestingly, the transcription factors *ASCL1* and  
143 *GSX2* were not only predicted to be regulating hPSN differentiation but were also shown to be  
144 1.76-fold and 2.97-fold downregulated with alcohol, respectively (Fig. 2D, Supplemental Table 5).  
145 Importantly, both these transcription factors are known to be involved in GABAergic interneuron  
146 patterning, as well as axonogenesis and synaptic patterning (Mizuguchi 2006, Kessarar 2014,  
147 Sun 2016). In contrast to *ASCL1* and *GSX2*, *EOMES* (*TBR2*) was found to be upregulated 1.76-  
148 fold with alcohol, and has been shown to be a critical regulator of cortical glutamatergic neuron  
149 differentiation (Arnold 2008, Sessa 2008). *SOX2* and *SHH*, critical regulators of neural progenitor  
150 cells and regional patterning of the cortex, were additionally found to be potential upstream targets  
151 of alcohol in our dataset. However, these were not significantly altered in the abundance of their  
152 transcripts by alcohol; it is worth noting that neither *SHH*, nor any of the hedgehog ligands, were  
153 found to be expressed to detectable levels as demonstrated previously for default-derived  
154 neurons from the H9 cell line (Xu 2010, Floruta 2017, Nadadhur 2018).

155 **Alcohol Exposure Alters Transcripts associated with both GABAergic and Glutamatergic**  
156 **Neuron Differentiation**

157 Multiple studies have previously implicated developmental alcohol exposure and  
158 alterations to the expression of several genes known to affect the patterning, differentiation and  
159 migration of GABAergic interneurons, including by our group (Yeh 2008, Vangipuram 2011,  
160 Larsen 2016). In the current study, our data suggest multiple levels of regulation at which this  
161 GABAergic developmental program is altered. The genes encoding for numerous transcription  
162 factors (TFs) associated with interneuron development were significantly *downregulated*,  
163 including *ASCL1*, *GSX2*, *SIX3* as well as multiple members of the DLX family of TFs (*DLX1/2/5/6*)  
164 (Fig. 3A). In addition, alcohol downregulated markers of mature post-mitotic neurons (*NPY* and  
165 *SST*) as well as both mRNAs coding for the GABA-synthetic enzymes glutamic acid  
166 decarboxylase 65/67 (*GAD1/2*) by more than 2-fold (Fig. 3A). The simultaneous upregulation of  
167 mature interneuron subtypes (*NDNF* and *RELN*) may suggest compensatory changes that  
168 maintain E/I balance in default-generated hPSNs exposed to chronic alcohol (Lake 2016).

169 While we did not previously identify glutamatergic patterning genes altered by alcohol  
170 using targeted PCR-based analyses (Larsen 2016), other studies have shown that alcohol  
171 significantly impacts cortical glutamatergic neuron generation (Qin 2017). Importantly, the current  
172 RNA-sequencing analyses did identify a large number of transcripts involved glutamatergic  
173 neuron specification to be significantly altered in the alcohol-treated group (Fig. 3B). In contrast  
174 to GABAergic transcripts, most glutamatergic mRNAs were upregulated. This included the  
175 homeobox domain-containing transcription factors *EMX2*, *LHX1/2/5/9* and *OTX2*, the zinc finger  
176 protein *FEZF2*, basic helix-loop-helix transcription factors *NEUROD1/2/6*, *NEUROG2* (*NGN2*)  
177 and importantly both t-box binding proteins *TBR1* and *TBR2* (*EOMES*). Interestingly, *OTX2* as  
178 well as the DLX family of TFs, have been recognized for their role not only in brain development,  
179 but also craniofacial development, specifically of the rostral aspects of the head (Qui 1997, Wilkie  
180 2001). This is noteworthy as dysregulation of these processes is a hallmark of individuals with  
181 FAS (Matsuo 2018). The proteins coded for by a number of these genes have also been identified



182 by other groups as showing altered expression with prenatal alcohol exposure, such as TBR2  
183 (Rakic 2011), FEZF2, NEUROD2, and NEUROG2 (Mandal 2018).

184 To understand whether microRNAs may play a role in altering mRNA expression we  
185 performed nanostring-based sequencing of the same samples that were run for bulk RNA-  
186 sequencing. Interestingly, relatively few miRNAs were significantly altered by we discovered a  
187 significant two-fold increase in *miR-23b*, a developmentally-regulated miRNA known to be  
188 enriched in glutamatergic cells over GABAergic, as *miR-23b* is thought to bind and sequester  
189 *DLX1*, repressing its IN-patterning effect (Figure 3C, He 2012). Furthermore, *miR-23b* expression  
190 is inversely correlated to *DLX1* expression in these data, suggesting yet another potential level of  
191 phenotypic regulation in these developing cortical cells (Figure 3D, Supplemental Figure 2).

192

### 193 **Transcripts involved with synaptic function implicate altered E/I balance in PAE**

194 In addition to the perturbations of genes related to neuronal specification, KEGG and IPA  
195 analyses revealed that alcohol had a highly significant effect on mRNAs involved both GABAergic  
196 and glutamatergic synaptic function (Figure 2B). Figure 4B shows a diagrammatic summary of  
197 data list in Figure 4A. On balance, these data illustrate an overall reduction of gene expression  
198 associated with GABA signaling and concurrent increase in glutamatergic transmission-  
199 transcripts. Specifically, both enzymes required for the synthesis of GABA (*GAD1* and *GAD2*),  
200 along with the vesicular GABA transporter *VGAT/SLC32A1*, were all significantly downregulated  
201 more than 2-fold. In contrast, both vesicular glutamate transporters (*VGLUT1/SLC17A7* and  
202 *VGLUT2/SLC17A6*) showed concurrent upregulation. Of additional interest were the alcohol-  
203 mediated changes to the expression of multiple members of the glypican family (*GPC1, 3, 4*),  
204 which are astrocyte-secreted factors that have been shown to be sufficient for inducing functional  
205 glutamatergic synapse formation (reviewed by Allen & Eroglu 2017). Collectively, these data add

206 to the hypothesis that altered E/I imbalance may be a crucial mechanism underlying FASD  
207 pathologies despite the fact that our previous findings did not reveal gross changes in ratios of  
208 excitatory and inhibitory post-synaptic currents (Larsen et al., 2016).

### 209 **Alcohol primarily alters the WNT family of Secreted Morphogens**

210 Appropriate spatial and temporal regulation of secreted morphogens is required for proper  
211 regionalization, cell-type specification, axon guidance, and synaptic development of the brain and  
212 spinal cord during (Wilson 2004, Lumsden 2005). Major morphogen signaling pathways  
213 implicated in these processes include the bone morphogenetic proteins (BMPs), fibroblast growth  
214 factors (FGF), Notch/Delta, and members of the hedgehog (HH) family (reviewed in Mallamaci  
215 2006). Figure 5A-E highlights selected members of each of these families that have been shown  
216 to facilitate cortical patterning and are expressed in default-differentiated hPSN cultures. While  
217 some individual transcripts of the BMP (*BMP2/7*), FGF (*FGFR3*), Notch (*NOTCH3*), and HH  
218 (*GLI3*) pathways were altered with alcohol, the preponderance of the genes within each pathway  
219 remained relatively unchanged with the notable exception of WNT signaling transcripts (Fig. 5E).

220 By contrast, transcripts associated with the WNT signaling pathway were identified  
221 through unbiased informatic analyses (Fig. 2B, C) as significantly altered in alcohol-treated  
222 hPSNs. Overall, fourteen transcripts associated with WNT signaling were altered by alcohol  
223 treatment, with 85.7% (12/14) of the genes investigated demonstrating significant upregulation.  
224 Interestingly, all three members of the secreted WNT co-agonist R-spondins (*RSPO1-3*) were  
225 among the most significantly upregulated transcripts. In addition, the WNT ligand transcripts  
226 *WNT5A*, *7A* and *8B* (Fig. 5E) were also all significantly upregulated. Importantly, not only were  
227 secreted ligands altered, downstream transcription factor targets of WNT signaling were also  
228 upregulated with alcohol treatment, including *TCF3/4* and *LEF1*. On the other hand, one of the  
229 most highly downregulated WNT factors was the Frizzled receptor (*FZD5*), which was lowered to

230 nearly undetectable levels in alcohol-treated cells. However, the more highly expressed *FZD2*  
231 receptor showed a minor but significant increase in expression.

232 **Alcohol exposure specifically increases transcripts with rostro-caudal enrichment and**  
233 **decreases antero-ventral markers**

234 WNT signaling has been determined to play multiple developmental roles related to self-  
235 renewal and synaptic development, but given its role as a driver of dorsal and caudal patterning  
236 in the developing forebrain, we sought to examine how alcohol exposure affected transcription  
237 factor expression along the rostral-caudal (A-P) and dorsal-ventral (D-V) neuraxes (O'Leary 2007,  
238 Harrison-Uy 2012, Bocchi 2017). It should be noted that among the non-WNT related morphogens  
239 be altered with alcohol exposure, nearly all upregulated factors (*FGF2/3*, *BMP7* and *GLI3*) show  
240 specific patterns of expression restricted to the more dorsal and especially caudal aspects of the  
241 nascent forebrain (Alzu'bi 2017). As secreted morphogens do not act alone, but in part also  
242 coordinate the expression and activity of TFs encoding regional and cell-type specific identities,  
243 other factors involved in areal coding were examined in these data (Fig. 6A).

244 Several important markers of the rostral aspect of the developing forebrain were either not  
245 expressed above background levels or were strongly downregulated in context of alcohol  
246 exposure. Among these, *FGF8*, a protein understood to coordinate the assembly of the rostral  
247 neural ridge (ANR), a crucial signaling center that regulates many regional and cell fate decisions  
248 was not found to be expressed in these data. This could indicate that the model described in this  
249 report tends to generate neurons of an overall more caudal cortical phenotype, and may  
250 complicate drawing conclusions about the regionalizing effects of alcohol. However the  
251 downregulation of transcription factors such *ROBO1* and *SIX3*, also known to help establish  
252 rostral regional identity, still strongly suggest an alcohol-mediated shift away from whatever rostral  
253 character exists within these cells. Additionally, transcription factor ventral-rostral homeobox 1  
254 (*VAX1*), which functions to specify ventral domains of the developing forebrain as well as

255 coordinating midline craniofacial morphogenesis, shows a nearly 4-fold downregulation (Hallonet  
256 1999).

257 Downregulation of transcripts with ventral patterns of expression was also noted in these  
258 data, although perhaps to a lesser degree than purely rostral factors. This effect may be in part  
259 due to the significant decrease in transcripts implicated in GABAergic IN development in the  
260 ganglionic eminences (GE). Multiple of these factors were significantly decreased with alcohol,  
261 including the homeobox genes in the *DLX* family and *GSX2*, as well as *ASCL1* (Fig 6B). The more  
262 caudal GE marker *COUPTFII* was however upregulated. As previously mentioned, hedgehog  
263 signaling through the smoothed receptor is also understood to be crucial regulator of ventral  
264 forebrain specification, but *SHH* expression interesting proved to be well below our threshold of  
265 detection. Changes to dorsally-specified genes was more minimal. The transcription factor *MSX2*,  
266 which was shown to be upregulated, shares a role with *VAX1* in coordinating craniofacial  
267 development, altered development of which is a canonical feature of FAS (Depew 2002, Jeong  
268 2008, Jin 2011, Geohegan 2018).

269 The majority of the alterations to regionally-restricted genes display a coordinated  
270 upregulation of caudally restricted gene products. The changes to caudally expressed *WNTs*  
271 drove much of this observation, but TFs such as *EMX2* and *COUPTFII* were also more highly  
272 expressed with alcohol exposure. *FGFR3* expression, also increased with alcohol, has been  
273 demonstrated to regulate the development of caudal telencephalon and proper migration and  
274 integration of GABAergic INs into the cortex (Moldrich 2011). Taken together these data suggest  
275 a diminished rostral character of NPCs and neurons exposed to alcohol, with a concomitant  
276 upregulation of transcripts associated with caudal forebrain regions suggesting an overall  
277 caudalization of the alcohol-exposed forebrain in very early stages of development.

## 278 **Discussion**

279           The transcriptomic data reported here provide unique insights into the potential  
280 mechanisms of cortical dysfunction in patients with FASD. We found that many of the alcohol-  
281 induced changes could be clustered into a relatively small number of biologically relevant  
282 categories pertaining to cell fate decisions, synaptic specificity and cortical regionalization.  
283 Consistent with previous reports, WNT signaling, known to be critical in multiple aspects of  
284 development such as self-renewal and cell fate commitment, proved to be disproportionately  
285 affected by the presence of alcohol compared to other secreted morphogens and mitogens.  
286 Based on the role of WNT signaling in determination of areal identity, we examined the regulation  
287 of a number of genes with regionally restricted patterns of expression and found evidence for a  
288 spectrum of up- and down-regulation along the nascent neuraxis. RNA species that are restricted  
289 in expression to rostro-ventral aspects of the forebrain in normal development showed notable  
290 downregulation, while more dorso-caudal gene products showed concurrent upregulation. Taken  
291 together, these data point to a potential primary effect of alcohol on WNT signaling, with the  
292 downstream consequence being overall caudalization of developing cerebral cortex. This is  
293 consistent with many well characterized teratogenic effects of developmental alcohol exposure,  
294 and may provide insights into a previously underappreciated genetic FASD phenotype with  
295 important implication for the functional deficits observed in these clinical populations.

296           Interesting among these data was the increase in overall gene expression, with more than  
297 twice as many genes upregulated in the context of alcohol exposure versus control cultures. This  
298 finding is consistent however with recent work concerning the epigenetic effects of blood-brain  
299 barrier permeable acetyl groups, generated by the metabolism of alcohol. A report from the  
300 University of Pennsylvania demonstrates the direct acetylation of histones in the gestating mouse  
301 brain from the maternal consumption of isotope-labeled alcohol (Mews 2019). This alcohol-

302 mediated brain histone acetylation in the embryo would lead to overall relaxing of the chromatin  
303 structure and an increase in gene expression, in agreement with these findings.

304         Although we were surprised to observe in this work specific alterations in transcripts  
305 associated with glutamatergic specification and synaptogenesis this has been previously  
306 observed by other groups. Phenotypic evidence for this imbalances from clinical studies  
307 suggests that individuals with FASD display significantly increased rates of seizure disorders  
308 compared to non-exposed individuals (Nicita 2014). Rodent models exposed to comparable  
309 alcohol concentrations to those used in this report demonstrate increased rates of glutamatergic  
310 differentiation and specification, which is hypothesized to proceeded in a *PAX6*-dependent  
311 manner (Kim 2010). Interestingly, despite high expression of *PAX6* in the vast majority of neural  
312 precursors generated in this differentiation scheme, we found no difference in *PAX6* expression  
313 with alcohol exposure in the current study, nor in our previous report, suggesting an alternative  
314 mechanism of E/I compensation (Larsen 2016). While multiple TFs thought to be required for  
315 nearly all GABA IN fates were downregulated (e.g. *ASCL1*, *GSX2*, *DLX1/2/5/6*), studies with  
316 *DLX1/2* knockout mice, despite leading to an embryonic lethal phenotype, surprisingly still  
317 demonstrate the generation of GABAergic neurons (Le 2007). Specifically, one possible  
318 explanation for this disparity is an upregulation of GABAergic neurons that are less affected by  
319 the loss of many upstream regulators thought to be required for GABA IN specification. Single-  
320 cell RNA sequencing experiments designed to assess cellular diversity in adult mouse visual  
321 cortex identified 49 distinct cell types, 23 of which represented diverse interneuron population,  
322 including two novel *NDNF*<sup>+</sup> IN subtypes, upregulated 2.61-fold with alcohol in these data (Tasic  
323 2016). Perhaps the lack of network-level alterations to frequency and amplitude of miniature  
324 psot-synaptic potentials is compensated for not by overall changes to the number of INs, but  
325 rather a protective redistribution of their respective molecular identities among the diversity of IN  
326 subtypes that the field is only beginning to understand. Another possibility is more subtle

327 alterations to noncoding RNA species such as microRNAs (miRNA), which represent an  
328 underappreciated set of potential targets for understanding mechanisms of disease pathology,  
329 due to their diverse roles in coordinating convergent signaling pathways (Hébert 2008).

330 Key among the findings in this report was the preferential dysregulation of WNT  
331 signaling with alcohol, an alteration with many potential implications. The secreted family of  
332 WNT signaling molecules and their downstream effectors are known to regulate diverse  
333 developmental processes from the delineation of the initial germ layers to maintenance of stem  
334 cell proliferation and overall patterning of the forebrain (Lindsley 2006, Harrison-Uy 2012, Merrill  
335 2012). Additionally, WNTs and their receptors have been found to influence synaptogenesis and  
336 synapse strengthening/maintenance (Ahmad-Annuar 2006). WNT ligands necessary for cell  
337 cycle regulation (WNT1/3A) were not affected by alcohol exposure, but additional family  
338 members with influence on synaptogenesis did show surprising degrees of dysregulation in  
339 these data. For instance, the highly expressed WNT7A ligand promotes synaptic assembly from  
340 the presynaptic bouton as well as synaptic vesicle recycling (Hall 2000). Although WNT7A  
341 ligand expression was unaltered with alcohol, shRNA knockdown of the receptor protein  
342 frizzled5 (FZD5) suggests that FZD5 is necessary for WNT7A's activity at nascent synapses  
343 (Sahores 2010). Interestingly, FZD5 is one of the only WNT-related transcripts to show  
344 significant reduction with alcohol exposure. This suggests that despite WNT7A not being  
345 regulated directly by alcohol, its effect through the FZD5 receptor is likely compromised,  
346 potentially reducing WNT7A's positive effect on excitatory glutamatergic tone overall as one  
347 potential mechanism of E/I compensation through WNT signaling. Another WNT protein that has  
348 been extensively studied for its role in synapse formation and maintenance is WNT5A – among  
349 the most highly upregulated in our study (Salinas 2012). In a FZD5-independent manner,  
350 WNT5A promotes synaptic assembly through binding Ror tyrosine receptors, which are also  
351 highly upregulated (Paganoni 2010). Interestingly, WNT5A increases the clustering of PSD95

352 and GABAA receptors when applied to hippocampal neurons in vitro, increasing mini inhibitory  
353 postsynaptic current (mIPSC) amplitude but not frequency (Farias 2009, Cuitino 2010). While  
354 this does not directly explain the E/I compensation observed, it does clearly indicate the  
355 convergence of multiple WNT proteins with alcohol-regulated expression on GABA- and  
356 glutamatergic tone rather than cell cycle and proliferation.

357 In addition to WNT proteins' roles in synapse formation and maintenance, the  
358 preponderance of literature on WNT signaling focuses on their involvement with nervous system  
359 patterning (reviewed in Mulligan 2012). Specifically, one WNT family member, WNT5A, has  
360 been demonstrated in knockout models to be necessary for the development of caudal brain  
361 structures (Kumawat 2016). Broadly speaking however, WNTs tend to antagonize the  
362 ventralizing actions of sonic hedgehog in the neural tube, as well as FGF8 signaling in the  
363 rostral pole of the telencephalon (Danesin 2009). Expression of FGF8 at the rostral pole of the  
364 developing telencephalon is sufficient to coordinate the assembly of an entire regional signaling  
365 center referred to as the rostral neural ridge (ANR), (Shanmugalingam 2000). Interestingly,  
366 neither SHH nor FGF8 were expressed to detectable levels in neuroepithelial cells derived from  
367 the H9 cell line when differentiated via default methods (Supplemental Table 1, Floruta et al.,  
368 2017). The lack of FGF8 and SHH expression in these data is interesting as it potentially  
369 indicates an inherently caudal cell type due to either the H9 cell line or the default differentiation  
370 protocol that is enhanced by alcohol exposure. It is possible that other e/iPSC cell lines that  
371 express these factors to a greater basal extent could buffer the phenotype more effectively  
372 against caudalizing WNT signaling pathways.

373 Beyond to WNT signaling, TFs such as NR2F2 (COUP-TFII) and EMX2 are known to  
374 coordinate regional cortical identity, as knockout of these factors demonstrably expands the  
375 extent of the caudal forebrain rostrally (Mallamaci 2000). These current data were obtained in a  
376 human developmental model system however, so it is important to review the emerging work  
377 concerning regional distribution of TFs and morphogens in *in utero* human cortex. The Clowry



378 lab in Newcastle, UK has demonstrated that in human developing cortex, the genes for NR2F2  
379 and FGFR3 are among the most significantly enriched in caudal forebrain and both show  
380 significant upregulation with alcohol (Alzu'bi 2017). The same study showed that the DLX family,  
381 along with ASC1 and ROBO1 to be among the most rostrally enriched. All of these were  
382 downregulated by alcohol exposure in this study. ROBO1, downregulated here with alcohol, has  
383 been shown to suppress WNT signaling in human NPCs, potentially further exacerbating the  
384 alcohol-mediated caudalization (Andrews 2006). Furthermore, SP8 transcriptional repression by  
385 EMX2 has been reported to underlie some of the earliest A-P patterning in developing mouse  
386 brain (Sahara 2007) and knockout of SP8 expands caudal CoupTFI/II expression into more  
387 rostral cortical regions (Zembryzcki 2007). SP8 was unaltered in these data, but the  
388 upregulation of EMX2 would suggest an expansion of cells expressing that marker at the  
389 expense of SP8<sup>+</sup> rostral cell types. Taken together, these data suggest that TFs, in addition to  
390 morphogens like WNTs, are coordinating a caudalized cortical phenotype with alcohol  
391 exposure.

392         One final potential caveat we must consider in the discussion of these data is the  
393 growing understanding that despite universal expression of certain markers of stemness,  
394 various human embryonic stem cell lines have diverse genotypes and epigenetic modifications  
395 that likely subtly prime cells of different lines down slightly different developmental trajectories.  
396 Genetic diversity among hES cell lines have been appreciated since the early 2000s, and more  
397 recently these differences have been investigated more thoroughly by The International Stem  
398 Cell Initiative, but the implication for line-specific variability in default patterned cells remains  
399 poorly understood (Allegrucci 2006, The International Stem Cell Initiative 2007). More recent  
400 investigations into these differences have linked the genetic variation in part to modifications  
401 between the chromatic architecture of various pluripotent cell lines, arguing that this lineage-  
402 specific variability may lead to differences in terminal differentiation programs at the  
403 transcriptomic level (Rubin 2017). This becomes a crucial point when discussing conclusions

404 about the effects of alcohol on cortical regionalization, as these programs may vary between  
405 pluripotent lineages and in order to fully verify this caudalizing effect of developmental alcohol  
406 exposure on forebrain, multiple ES cell lines must be validated.

407

## 408 **Materials and Methods**

### 409 **hPSC Maintenance and Differentiation**

410 Neurons were differentiated from the WA09 (H9) pluripotent stem cell line maintained in mTsr1  
411 medium (Stem Cell Technologies, Vancouver, BC, Canada). Stem cells were plated in 6-well  
412 plates coated in Matrigel in feeder-free conditions with daily media changes and split 1:6 one day  
413 before reaching confluency to ensure maintenance of pluripotency. On day 0 of neuronal  
414 differentiation, plated H9 cells were treated with 1mg/ml dispase solution for 5 minutes and lifted  
415 into 3D culture as Serum Free Embryoid Bodies (SFEB). SFEBs were maintained for 3 days in  
416 mTsr1 media, then transitioned to NSM, continuing with daily media changes. Following 21 days  
417 of culture, neurospheres are plated onto glass coverslips treated with poly-D-ornithine (0.1mg/ml,  
418 Sigma) and laminin (5ug/ml, Life Tech) in a 24-well format and allowed to adhere. Following  
419 adherence of the neurospheres to the coverslips, cells were transitioned to neural differentiation  
420 media (NDM) which they were fed every other day and consisted of DMEM/F12 media  
421 (ThermoFisher Scientific), supplemented with BDNF and GDNF (10ng/ml; Peprotech, Rocky Hill,  
422 NJ), cAMP (1 $\mu$ M; Sigma), ascorbic acid (200 $\mu$ M; Sigma) and laminin (500ng/ml). For alcohol  
423 treatment, alcohol was supplemented into cell culture media daily up to 50mM from day 0 until  
424 cells were processed for RNA at day 50.

### 425 **RNA Isolation and cDNA Prep**

426 Following harvest of day 50 neurons in ice cold PBS solution, RNA species were purified with the  
427 miRNeasy RNA Isolation Kit (Qiagen) according to the manufacturer's recommendations. RNA  
428 concentration and quality were assessed with the Nanodrop 2000 spectrophotometer  
429 (Thermofisher Scientific). In order to analyze mRNA species in our sample, 100-400ng of total  
430 RNA was processed using the SuperScript IV First-Strand Synthesis System (Thermofisher  
431 Scientific). miRNA processing utilized the Taqman miRNA Reverse Transcription Kit to synthesize  
432 cDNA for analysis (Thermofisher Scientific).

### 433 **RNA-sequencing**

434 RNA libraries were prepared and sequenced as described previously (Brown 2017). Briefly, Total  
435 RNA was ribo-depleted with Low Input RiboMinus Eukaryote System v2 (Thermo Fisher Scientific,  
436 A15027). Ion Total RNA-Seq Kit v2 was used to make cDNA, add barcodes, and amplify the  
437 library. RNA libraries were sequenced on P1v2 chips using the Ion Proton™ System (Thermo  
438 Fisher Scientific, #4476610). Sequencing was completed by the Analytical and Translational  
439 Genomics Shared Resource at the University Of New Mexico Cancer Center. Exon feature counts  
440 were generated with HTSeq-count (Anders 2014) using a modified RefSeq references, and gene  
441 level expression counts were generated by summing exon based counts.

#### 442 **Nanostring miRNA profiling**

443 Mature miRNA profiling was performed with the NanoString nCounter miRNA Expression Assay  
444 Kit at the University of Arizona Genetics Core as previously described. nSolver NanoString  
445 software was utilized to calculate the geometric means of all miRNAs and normalize the dataset  
446 for analysis. The top 400 most highly expressed miRNAs were selected for further analysis.

#### 447 **Data Analysis**

448 Raw RNA-Seq reads were aligned to the human genome (CRGh37; hg19) using Torrent Mapping  
449 Alignment Program (TMAP, v4.06) and the read counts at gene level were summarized using HT-  
450 Seq as previously described [K1]. Only the protein coding genes with at least two samples from  
451 one of the conditions whose counts were greater than 10 were retained for the analysis. The read  
452 counts data were normalized using trimmed mean of M-values (TMM) implemented in software  
453 edgeR[K2][K3]. The genes that are differentially expressed between alcohol and Control were  
454 identified using Quasi-likelihood F-test under the generalized linear model framework (also  
455 implemented in edgeR), which appropriately took into accounts the correlation between the paired  
456 samples. Adjustments for multiple comparisons were conducted via Benjamini-Hochberg false  
457 discovery rate (FDR) method [K4] and the significance level was set at FDR = 0.05. Follow-up  
458 pathway analyses were performed using DAVID bioinformatics suit (v6.8), software IPA[K5] and  
459 Bioconductor package Signaling Pathway Impact Analysis (SPIA)[K6].

460 Categorizations by gene ontology were carried out using the DAVID Bioinformatics Resources  
461 (v6.8) hosted by the Laboratory of Human Retrovirology and Immunoinformatics (LHRI). Pathway  
462 analyses performed using the Kyoto Encyclopedia of Genes and Genomes (KEGG) database as  
463 well as using Ingenuity Pathway Analysis software (IPA; Qiagen, Hilden, Germany). RNA-  
464 sequencing data files have been deposited in the NCBI Sequence Read Archive (SRA) repository  
465 (<http://www.ncbi.nlm.nih.gov/sra/>) with accession number XYZ. Error bars relating to fold change  
466 differences represents SEM of calculated fold-change between three biological replicates.

467

468 This research was partially supported by UNM Comprehensive Cancer Center Support Grant  
469 NCI P30CA118100 and made use of the Analytical and Translational Genomics Shared  
470 Resource, which receives additional support from the State of New Mexico.

471

472 **References:**

- 473 1. Ahmad-Annuar A, Ciani L, Simeonidis I, Herreros J, Fredj NB, Rosso SB, et al. Signaling  
474 across the synapse: a role for Wnt and Dishevelled in presynaptic assembly and  
475 neurotransmitter release. *J Cell Biol.* 2006 Jul 3;174(1):127–39.
- 476 2. Alzu'bi A, Lindsay SJ, Harkin LF, McIntyre J, Lisgo SN, Clowry GJ. The Transcription Factors  
477 COUP-TFI and COUP-TFII have Distinct Roles in Arealisation and GABAergic Interneuron  
478 Specification in the Early Human Fetal Telencephalon. *Cerebral Cortex.* 2017 Oct  
479 1;27(10):4971–87.
- 480 3. Astley SJ, Richards T, Aylward EH, Olson HC, Kerns K, Brooks A, et al. Magnetic resonance  
481 spectroscopy outcomes from a comprehensive magnetic resonance study of children with fetal  
482 alcohol spectrum disorders. *Magnetic Resonance Imaging.* 2009 Jul;27(6):760–78.
- 483 4. Bocchi R, Egervari K, Carol-Perdiguer L, Viale B, Quairiaux C, De Roo M, et al. Perturbed  
484 Wnt signaling leads to neuronal migration delay, altered interhemispheric connections and  
485 impaired social behavior. *Nat Commun.* 2017 Dec;8(1):1158.
- 486 5. Cuitino L, Godoy JA, Farias GG, Couve A, Bonansco C, Fuenzalida M, et al. Wnt-5a  
487 Modulates Recycling of Functional GABAA Receptors on Hippocampal Neurons. *Journal of*  
488 *Neuroscience.* 2010 Jun 23;30(25):8411–20.
- 489 6. Cuzon VC, Yeh PWL, Yanagawa Y, Obata K, Yeh HH. alcohol Consumption during Early  
490 Pregnancy Alters the Disposition of Tangentially Migrating GABAergic Interneurons in the Fetal  
491 Cortex. *Journal of Neuroscience.* 2008 Feb 20;28(8):1854–64.
- 492 7. Danesin C, Peres JN, Johansson M, Snowden V, Cording A, Papalopulu N, et al. Integration  
493 of Telencephalic Wnt and Hedgehog Signaling Center Activities by Foxg1. *Developmental Cell.*  
494 2009 Apr;16(4):576–87.
- 495 8. Depew MJ. Specification of Jaw Subdivisions by Dlx Genes. *Science.* 2002 Oct  
496 11;298(5592):381–5.
- 497 9. Erceg S, Ronaghi M, Stojković M. Human Embryonic Stem Cell Differentiation Toward  
498 Regional Specific Neural Precursors. *Stem Cells.* 2009 Jan;27(1):78–87.
- 499 10. Fariás GG, Alfaro IE, Cerpa W, Grabowski CP, Godoy JA, Bonansco C, et al. *Wnt-5a* /JNK  
500 Signaling Promotes the Clustering of PSD-95 in Hippocampal Neurons. *J Biol Chem.* 2009 Jun  
501 5;284(23):15857–66.
- 502 11. Floruta CM, Du R, Kang H, Stein JL, Weick JP. Default Patterning Produces Pan-cortical  
503 Glutamatergic and CGE/LGE-like GABAergic Neurons from Human Pluripotent Stem Cells.  
504 *Stem Cell Reports.* 2017 Nov;9(5):1463–76.
- 505 12. Gaspard N, Vanderhaeghen P. From stem cells to neural networks: recent advances and  
506 perspectives for neurodevelopmental disorders: Review. *Developmental Medicine & Child*  
507 *Neurology.* 2011 Jan;53(1):13–7.
- 508 13. Granato A, Dering B. alcohol and the Developing Brain: Why Neurons Die and How  
509 Survivors Change. *IJMS.* 2018 Sep 30;19(10):2992.

- 510 14. Hall AC, Lucas FR, Salinas PC. Axonal Remodeling and Synaptic Differentiation in the  
511 Cerebellum Is Regulated by WNT-7a Signaling. *Cell*. 2000 Mar;100(5):525–35.
- 512 15. Hallonet M, Hollemann T, Pieler T, Gruss P. *Vax1*, a novel homeobox-containing gene,  
513 directs development of the basal forebrain and visual system. *Genes & Development*. 1999 Dec  
514 1;13(23):3106–14.
- 515 16. Hamilton DA, Magcalas CM, Barto D, Bird CW, Rodriguez CI, Fink BC, et al. Moderate  
516 Prenatal alcohol Exposure and Quantification of Social Behavior in Adult Rats. *JoVE*. 2014 Dec  
517 14;(94):52407.
- 518 17. Harrison-Uy SJ, Pleasure SJ. Wnt Signaling and Forebrain Development. *Cold Spring*  
519 *Harbor Perspectives in Biology*. 2012 Jul 1;4(7):a008094–a008094.
- 520 18. Hashimoto-Torii K, Kawasawa YI, Kuhn A, Rakic P. Combined transcriptome analysis of  
521 fetal human and mouse cerebral cortex exposed to alcohol. *Proceedings of the National*  
522 *Academy of Sciences*. 2011 Mar 8;108(10):4212–7.
- 523 19. Jeong J, Li X, McEvelly RJ, Rosenfeld MG, Lufkin T, Rubenstein JLR. *Dlx* genes pattern  
524 mammalian jaw primordium by regulating both lower jaw-specific and upper jaw-specific genetic  
525 programs. *Development*. 2008 Sep 1;135(17):2905–16.
- 526 20. Jin Y-R, Turcotte TJ, Crocker AL, Han XH, Yoon JK. The canonical Wnt signaling activator,  
527 *R-spondin2*, regulates craniofacial patterning and morphogenesis within the branchial arch  
528 through ectodermal–mesenchymal interaction. *Developmental Biology*. 2011 Apr;352(1):1–13.
- 529 21. Kamata T, Katsube K, Michikawa M, Yamada M, Takada S, Mizusawa H. *R-spondin*, a  
530 novel gene with thrombospondin type 1 domain, was expressed in the dorsal neural tube and  
531 affected in *Wnts* mutants. *Biochimica et Biophysica Acta (BBA) - Gene Structure and*  
532 *Expression*. 2004 Jan;1676(1):51–62.
- 533 22. Kanehisa M, Sato Y, Furumichi M, Morishima K, Tanabe M. New approach for  
534 understanding genome variations in KEGG. *Nucleic Acids Research*. 2019 Jan 8;47(D1):D590–  
535 5.
- 536 23. Kiecker C, Lumsden A. Compartments and their boundaries in vertebrate brain  
537 development. *Nat Rev Neurosci*. 2005 Jul;6(7):553–64.
- 538 24. Kim KC, Go HS, Bak HR, Choi CS, Choi I, Kim P, et al. Prenatal exposure of alcohol  
539 induces increased glutamatergic neuronal differentiation of neural progenitor cells. *J Biomed*  
540 *Sci*. 2010;17(1):85.
- 541 25. Kodituwakku PW. Defining the behavioral phenotype in children with fetal alcohol spectrum  
542 disorders: A review. *Neuroscience & Biobehavioral Reviews*. 2007 Jan;31(2):192–201.
- 543 26. Kramer M, Dutkowski J, Yu M, Bafna V, Ideker T. Inferring gene ontologies from pairwise  
544 similarity data. *Bioinformatics*. 2014 Jun 15;30(12):i34–42.
- 545 27. Kumawat K, Gosens R. *WNT-5A*: signaling and functions in health and disease. *Cell Mol*  
546 *Life Sci*. 2016 Feb;73(3):567–87.
- 547 28. Lange S, Rovet J, Rehm J, Popova S. Neurodevelopmental profile of Fetal alcohol  
548 Spectrum Disorder: A systematic review. *BMC Psychol*. 2017 Dec;5(1):22.

- 549 29. Larsen ZH, Chander P, Joyner JA, Floruta CM, Demeter TL, Weick JP. Effects of alcohol on  
550 Cellular Composition and Network Excitability of Human Pluripotent Stem Cell-Derived Neurons.  
551 alcohol Clin Exp Res. 2016 Nov;40(11):2339–50.
- 552 30. LaVaute TM, Yoo YD, Pankratz MT, Weick JP, Gerstner JR, Zhang S-C. Regulation of  
553 Neural Specification from Human Embryonic Stem Cells by BMP and FGF. Stem Cells. 2009  
554 Aug;27(8):1741–9.
- 555 31. Le TN, Du G, Fonseca M, Zhou Q-P, Wigle JT, Eisenstat DD. *Dlx* Homeobox Genes  
556 Promote Cortical Interneuron Migration from the Basal Forebrain by Direct Repression of the  
557 Semaphorin Receptor Neuropilin-2. J Biol Chem. 2007 Jun 29;282(26):19071–81.
- 558 32. Le TN, Zhou Q-P, Cobos I, Zhang S, Zagozewski J, Japoni S, et al. GABAergic Interneuron  
559 Differentiation in the Basal Forebrain Is Mediated through Direct Regulation of Glutamic Acid  
560 Decarboxylase Isoforms by *Dlx* Homeobox Transcription Factors. J Neurosci. 2017 Sep  
561 6;37(36):8816–29.
- 562 33. Leigland LA, Ford MM, Lerch JP, Kroenke CD. The Influence of Fetal alcohol Exposure on  
563 Subsequent Development of the Cerebral Cortex as Revealed by Magnetic Resonance  
564 Imaging. alcohol Clin Exp Res. 2013 Jun;37(6):924–32.
- 565 34. Lieberman R, Levine ES, Kranzler HR, Abreu C, Covault J. Pilot Study of iPS-Derived  
566 Neural Cells to Examine Biologic Effects of alcohol on Human Neurons In Vitro. alcohol Clin Exp  
567 Res. 2012 Oct;36(10):1678–87.
- 568 35. Lindsley RC. Canonical Wnt signaling is required for development of embryonic stem cell-  
569 derived mesoderm. Development. 2006 Oct 1;133(19):3787–96.
- 570 36. Mallamaci A, Stoykova A. Gene networks controlling early cerebral cortex arealization.  
571 European Journal of Neuroscience. 2006 Feb;23(4):847–56.
- 572 37. Mandal C, Park KS, Jung KH, Chai YG. alcohol-related alterations in gene expression  
573 patterns in the developing murine hippocampus. Acta Biochim Biophys Sin. 2015  
574 Aug;47(8):581–7.
- 575 38. Mariani J, Simonini MV, Palejev D, Tomasini L, Coppola G, Szekely AM, et al. Modeling  
576 human cortical development in vitro using induced pluripotent stem cells. Proceedings of the  
577 National Academy of Sciences. 2012 Jul 31;109(31):12770–5.
- 578 39. Marquardt K, Brigman JL. The impact of prenatal alcohol exposure on social, cognitive and  
579 affective behavioral domains: Insights from rodent models. alcohol. 2016 Mar;51:1–15.
- 580 40. Marquardt K, Sigdel R, Caldwell K, Brigman JL. Prenatal alcohol Exposure Impairs  
581 Executive Function in Mice into Adulthood. alcohol Clin Exp Res. 2014 Dec;38(12):2962–8.
- 582 41. Matsuo I, Kuratani S, Kimura C, Takeda N, Aizawa S. Mouse *Otx2* functions in the formation  
583 and patterning of rostral head. Genes & Development. 1995 Nov 1;9(21):2646–58.
- 584 42. Merrill BJ. Wnt Pathway Regulation of Embryonic Stem Cell Self-Renewal. Cold Spring  
585 Harbor Perspectives in Biology. 2012 Sep 1;4(9):a007971–a007971.



- 586 43. Mizuguchi R, Kriks S, Cordes R, Gossler A, Ma Q, Goulding M. *Ascl1* and *Gsh1/2* control  
587 inhibitory and excitatory cell fate in spinal sensory interneurons. *Nat Neurosci*. 2006  
588 Jun;9(6):770–8.
- 589 44. Mo Z, Milivojevic V, Zecevic N. Enforced *Pax6* Expression Rescues alcohol-Induced Defects  
590 of Neuronal Differentiation in Cultures of Human Cortical Progenitor Cells. *alcohol Clin Exp Res*.  
591 2012 Aug;36(8):1374–84.
- 592 45. Mulligan KA, Cheyette BNR. Wnt Signaling in Vertebrate Neural Development and Function.  
593 *J Neuroimmune Pharmacol*. 2012 Dec;7(4):774–87.
- 594 46. Mullor JL, Ruiz i. Altaba A. Growth, hedgehog and the price of GAS. *Bioessays*. 2002  
595 Jan;24(1):22–6.
- 596 47. Nadadhur AG, Alsaqati M, Gasparotto L, Cornelissen-Steijger P, van Hugte E, Dooves S, et  
597 al. Neuron-Glia Interactions Increase Neuronal Phenotypes in Tuberous Sclerosis Complex  
598 Patient iPSC-Derived Models. *Stem Cell Reports*. 2019 Jan;12(1):42–56.
- 599 48. Nicita F, Verrotti A, Pruna D, Striano P, Capovilla G, Savasta S, et al. Seizures in fetal  
600 alcohol spectrum disorders: Evaluation of clinical, electroencephalographic, and neuroradiologic  
601 features in a pediatric case series. *Epilepsia*. 2014 Jun;55(6):e60–6.
- 602 49. O’Leary DDM, Chou S-J, Sahara S. Area Patterning of the Mammalian Cortex. *Neuron*.  
603 2007 Oct;56(2):252–69.
- 604 50. Paganoni S, Bernstein J, Ferreira A. *Ror1-Ror2* complexes modulate synapse formation in  
605 hippocampal neurons. *Neuroscience*. 2010 Feb;165(4):1261–74.
- 606 51. Popova S, Lange S, Probst C, Gmel G, Rehm J. Estimation of national, regional, and global  
607 prevalence of alcohol use during pregnancy and fetal alcohol syndrome: a systematic review  
608 and meta-analysis. *The Lancet Global Health*. 2017 Mar;5(3):e290–9.
- 609 52. Quinn JC, Molinek M, Mason JO, Price DJ. *Gli3* is required autonomously for dorsal  
610 telencephalic cells to adopt appropriate fates during embryonic forebrain development.  
611 *Developmental Biology*. 2009 Mar;327(1):204–15.
- 612 53. Sadrian B, Wilson D, Saito M. Long-Lasting Neural Circuit Dysfunction Following  
613 Developmental alcohol Exposure. *Brain Sciences*. 2013 Apr 29;3(4):704–27.
- 614 54. Sahores M, Gibb A, Salinas PC. *Frizzled-5*, a receptor for the synaptic organizer *Wnt7a*,  
615 regulates activity-mediated synaptogenesis. *Development*. 2010 Jul 1;137(13):2215–25.
- 616 55. Shanmugalingam S. *Fgf8/Ace* in forebrain patterning. :13.
- 617 56. Skorput AGJ, Gupta VP, Yeh PWL, Yeh HH. Persistent Interneuronopathy in the Prefrontal  
618 Cortex of Young Adult Offspring Exposed to alcohol In Utero. *Journal of Neuroscience*. 2015  
619 Aug 5;35(31):10977–88.
- 620 57. Smith DK, Yang J, Liu M-L, Zhang C-L. Small Molecules Modulate Chromatin Accessibility  
621 to Promote *NEUROG2*-Mediated Fibroblast-to-Neuron Reprogramming. *Stem Cell Reports*.  
622 2016 Nov;7(5):955–69.

- 623 58. Sun AX, Yuan Q, Tan S, Xiao Y, Wang D, Khoo ATT, et al. Direct Induction and Functional  
624 Maturation of Forebrain GABAergic Neurons from Human Pluripotent Stem Cells. *Cell Reports*.  
625 2016 Aug;16(7):1942–53.
- 626 59. Suzuki IK, Vanderhaeghen P. Is this a brain which I see before me? Modeling human neural  
627 development with pluripotent stem cells. *Development*. 2015 Sep 15;142(18):3138–50.
- 628 60. Tang H, Zeng T, Chen L. High-Order Correlation Integration for Single-Cell or Bulk RNA-seq  
629 Data Analysis. *Front Genet*. 2019 Apr 26;10:371.
- 630 61. Tasic B, Menon V, Nguyen TN, Kim TK, Jarsky T, Yao Z, et al. Adult mouse cortical cell  
631 taxonomy revealed by single cell transcriptomics. *Nat Neurosci*. 2016 Feb;19(2):335–46.
- 632 62. Tchieu J, Zimmer B, Fattahi F, Amin S, Zeltner N, Chen S, et al. A Modular Platform for  
633 Differentiation of Human PSCs into All Major Ectodermal Lineages. *Cell Stem Cell*. 2017  
634 Sep;21(3):399-410.e7.
- 635 63. Treit S, Lebel C, Baugh L, Rasmussen C, Andrew G, Beaulieu C. Longitudinal MRI Reveals  
636 Altered Trajectory of Brain Development during Childhood and Adolescence in Fetal alcohol  
637 Spectrum Disorders. *Journal of Neuroscience*. 2013 Jun 12;33(24):10098–109.
- 638 64. Valenzuela CF. alcohol and Neurotransmitter Interactions. *RESEARCH WORLD*.  
639 1997;21(2):5.
- 640 65. Vangipuram SD, Lyman WD. alcohol Affects Differentiation-Related Pathways and  
641 Suppresses Wnt Signaling Protein Expression in Human Neural Stem Cells: ALCOHOL  
642 SUPPRESSES WNT SIGNALING PROTEINS. *alcoholism: Clinical and Experimental Research*.  
643 2012 May;36(5):788–97.
- 644 66. Varga ZM. Zebrafish smoothed. :13.
- 645 67. Wang H, Ge G, Uchida Y, Luu B, Ahn S. Gli3 Is Required for Maintenance and Fate  
646 Specification of Cortical Progenitors. *Journal of Neuroscience*. 2011 Apr 27;31(17):6440–8.
- 647 68. Wang M, Liu X, Chang G, Chen Y, An G, Yan L, et al. Single-Cell RNA Sequencing Analysis  
648 Reveals Sequential Cell Fate Transition during Human Spermatogenesis. *Cell Stem Cell*. 2018  
649 Oct;23(4):599-614.e4.
- 650 69. Weick JP, Liu Y, Zhang S-C. Human embryonic stem cell-derived neurons adopt and  
651 regulate the activity of an established neural network. *Proceedings of the National Academy of  
652 Sciences*. 2011 Dec 13;108(50):20189–94.
- 653 70. Weick JP. Functional Properties of Human Stem Cell-Derived Neurons in Health and  
654 Disease. *Stem Cells International*. 2016;2016:1–10.
- 655 71. Wilson SW, Houart C. Early Steps in the Development of the Forebrain. *Developmental Cell*.  
656 2004 Feb;6(2):167–81.
- 657 72. Xu Q, Guo L, Moore H, Waclaw RR, Campbell K, Anderson SA. Sonic Hedgehog Signaling  
658 Confers Ventral Telencephalic Progenitors with Distinct Cortical Interneuron Fates. *Neuron*.  
659 2010 Feb;65(3):328–40.

- 660 73. Zembrzycki A, Griesel G, Stoykova A, Mansouri A. Genetic interplay between the  
661 transcription factors Sp8 and Emx2 in the patterning of the forebrain. *Neural Dev.* 2007;2(1):8.
- 662 74. Zhang S-C, Wernig M, Duncan ID, Brüstle O, Thomson JA. In vitro differentiation of  
663 transplantable neural precursors from human embryonic stem cells. *Nat Biotechnol.* 2001  
664 Dec;19(12):1129–33.
- 665 75. Zhang X-Q, Zhang S-C. Differentiation of Neural Precursors and Dopaminergic Neurons  
666 from Human Embryonic Stem Cells. In: Turksen K, editor. *Human Embryonic Stem Cell*  
667 *Protocols* [Internet]. Totowa, NJ: Humana Press; 2009 [cited 2019 Sep 30]. p. 355–66. Available  
668 from: [http://link.springer.com/10.1007/978-1-60761-369-5\\_19](http://link.springer.com/10.1007/978-1-60761-369-5_19)
- 669 76. Zhu Y, Wang L, Yin F, Yu Y, Wang Y, Shepard MJ, et al. Probing impaired neurogenesis in  
670 human brain organoids exposed to alcohol. *Integr Biol.* 2017;9(12):968–78.
- 671

672 Figure 1

**A**

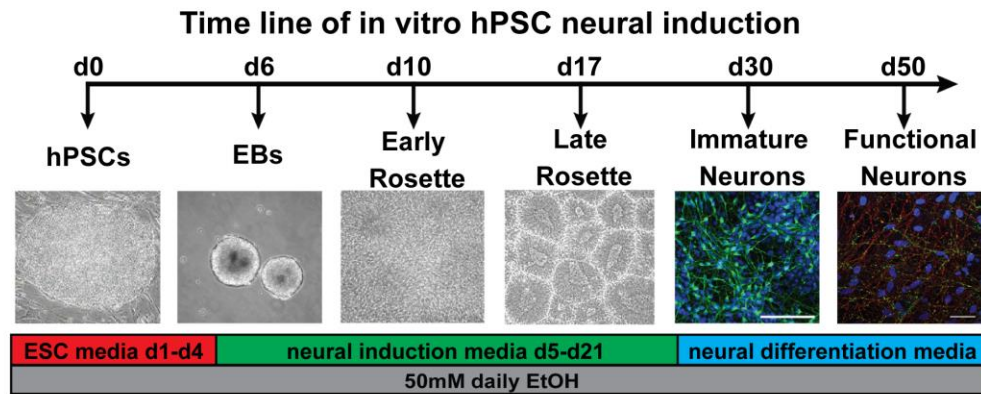

**B**

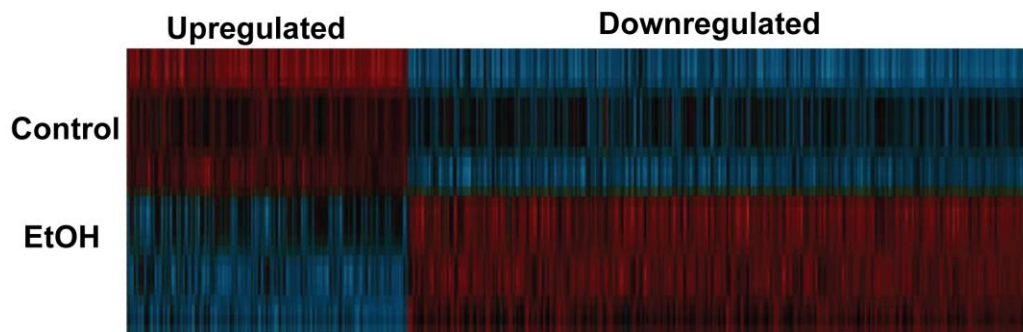

**C**

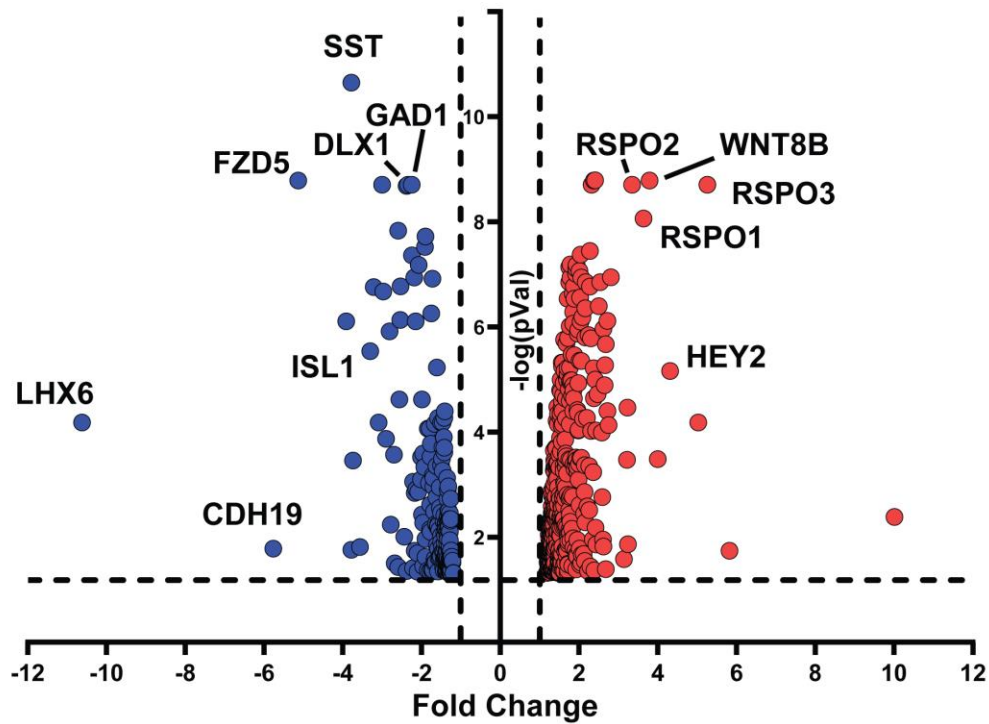

673

674

675 Figure 2

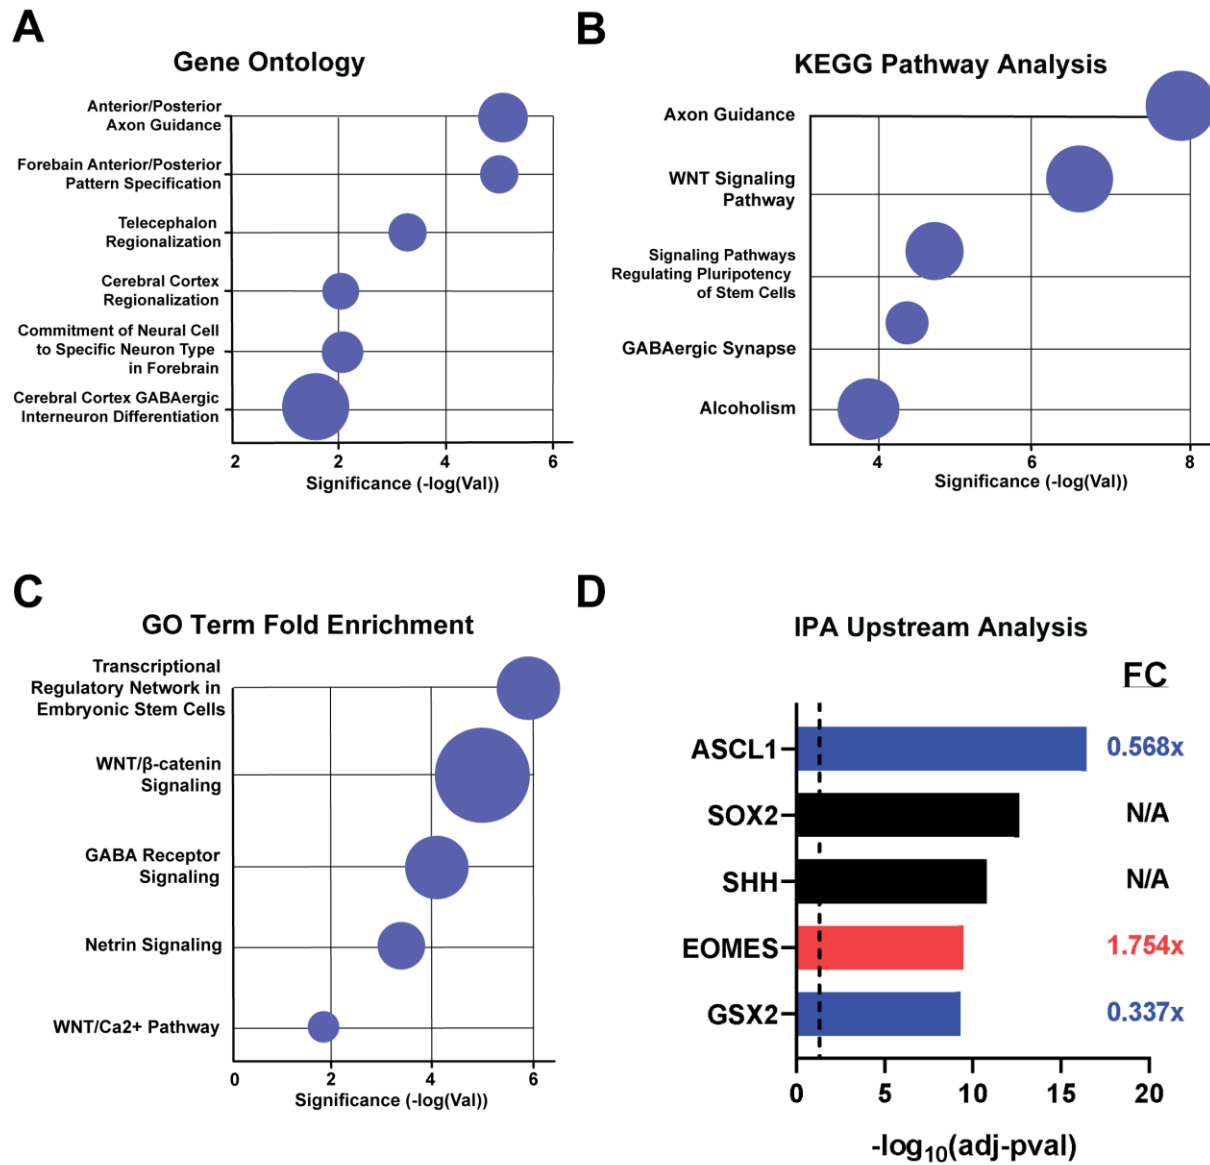

676

677

678 Figure 3

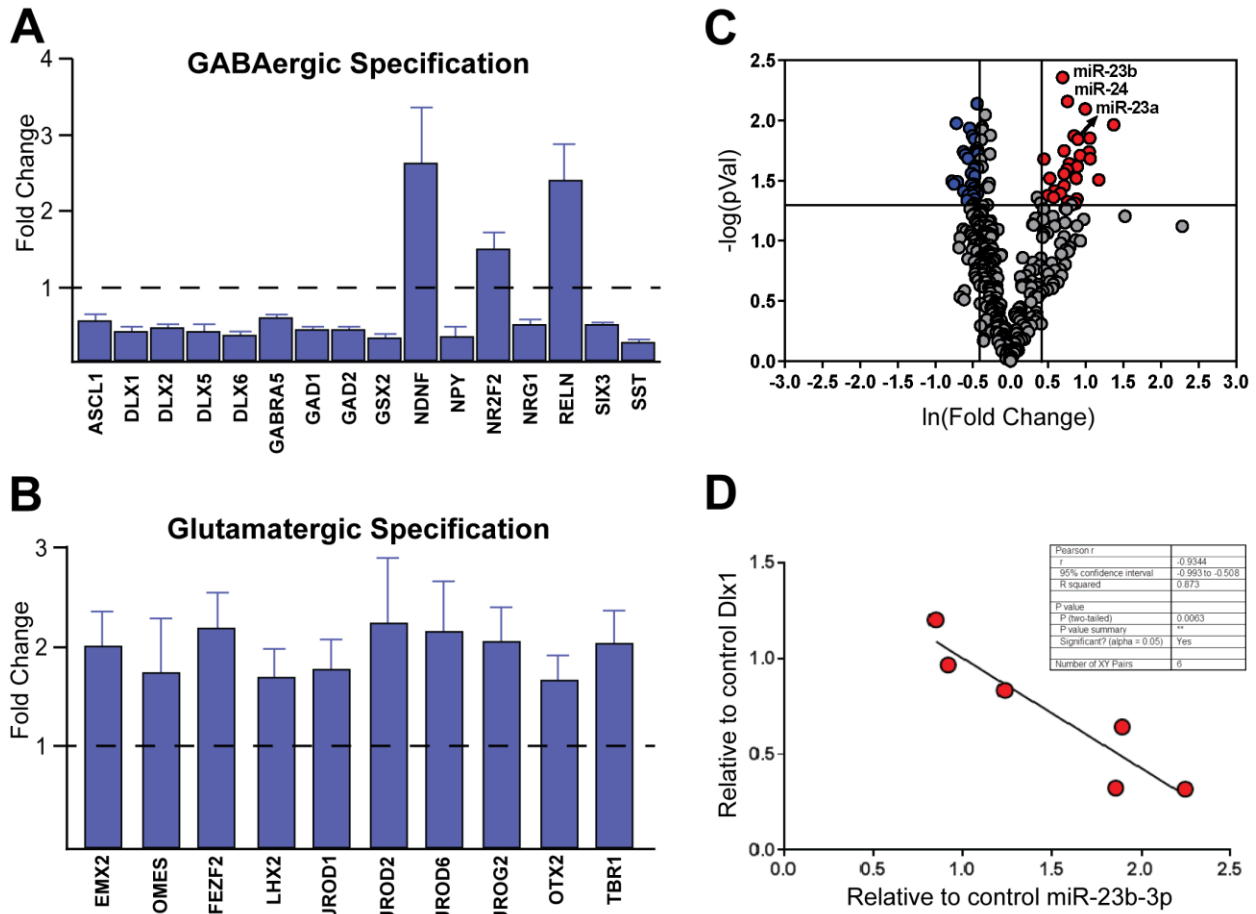

679

680

681 Figure 4

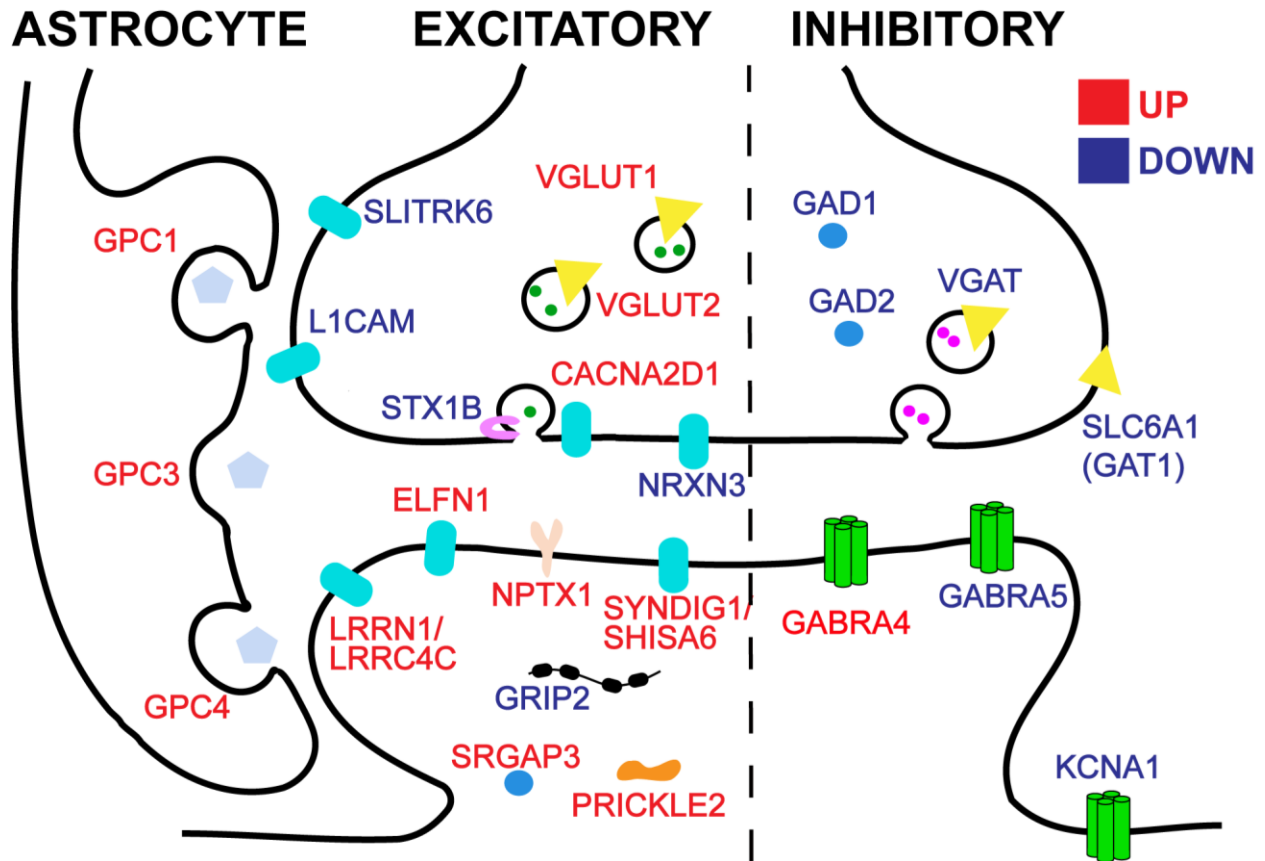

682

683

684 Figure 5

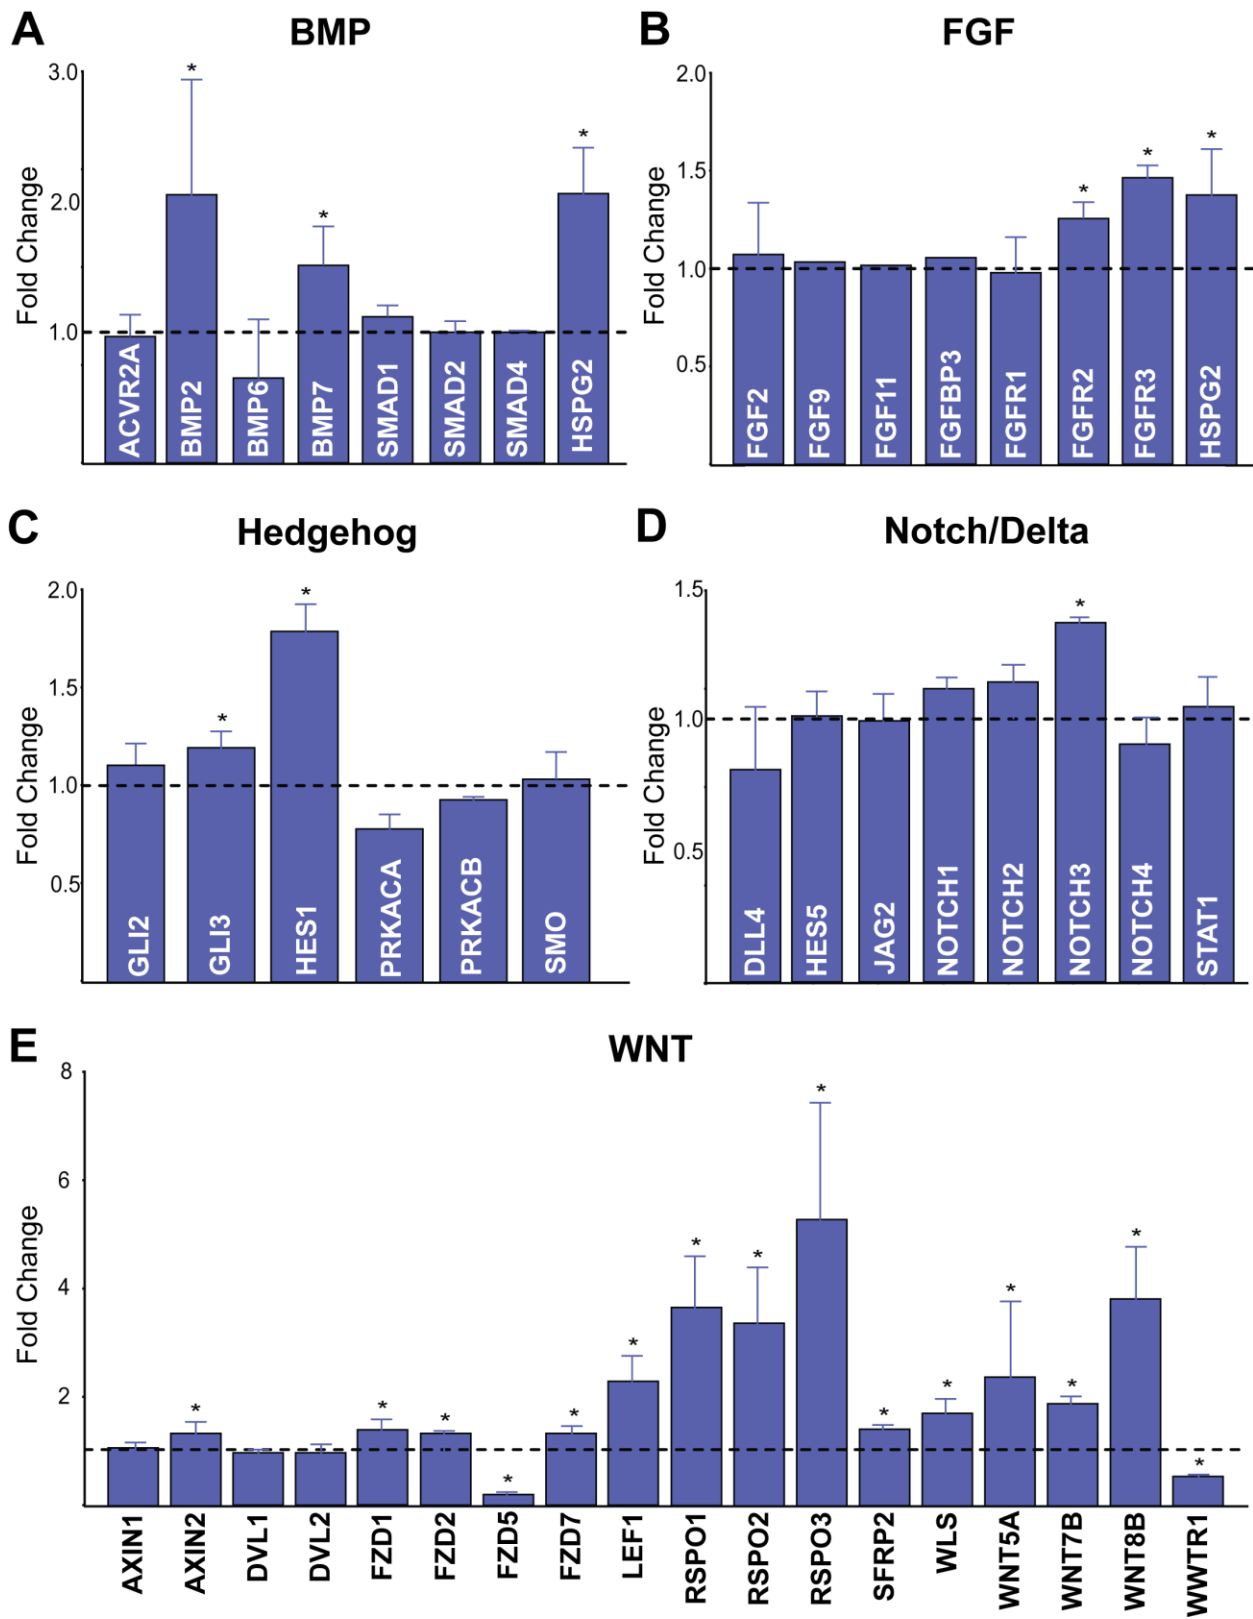

685

686



687 Figure 6

### Regionally Expressed Transcripts

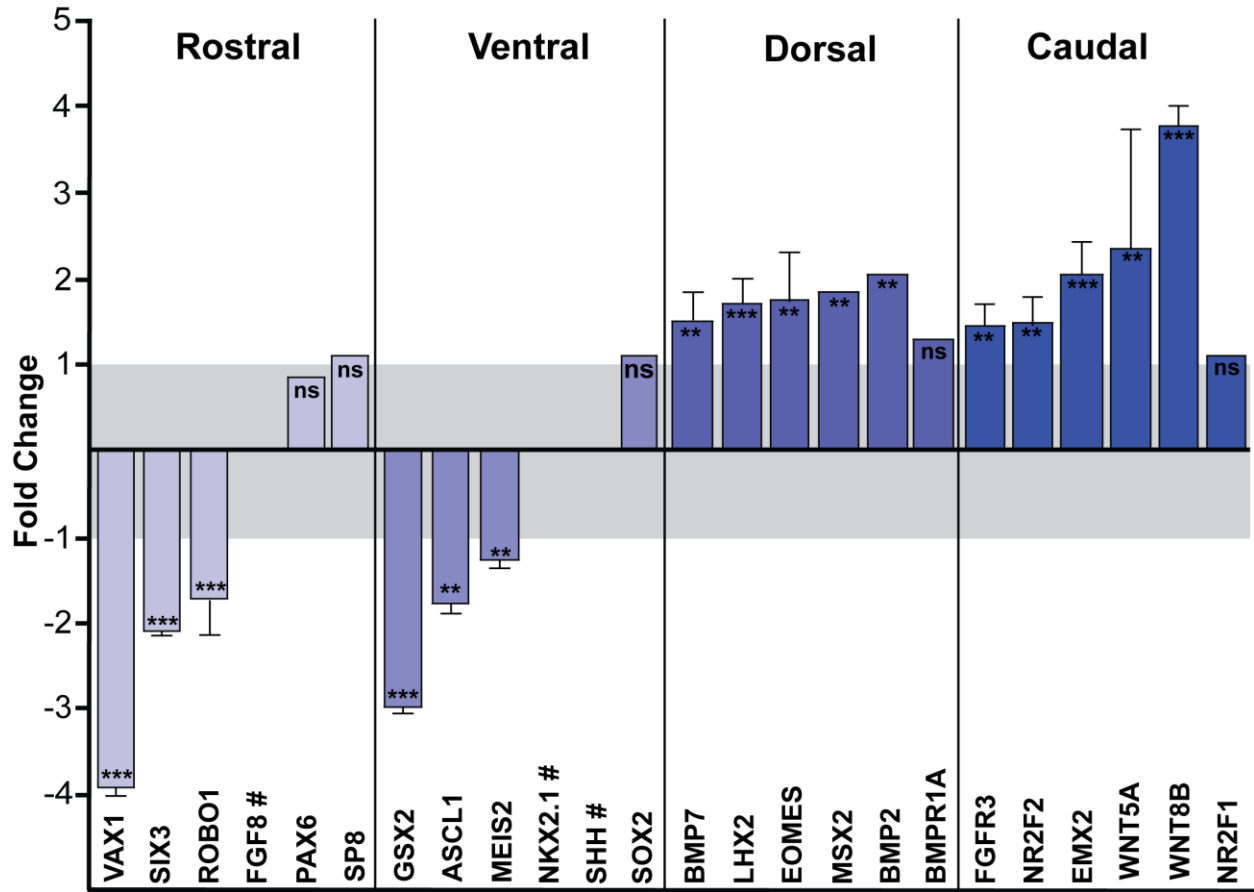

688

689

690 Figure 7

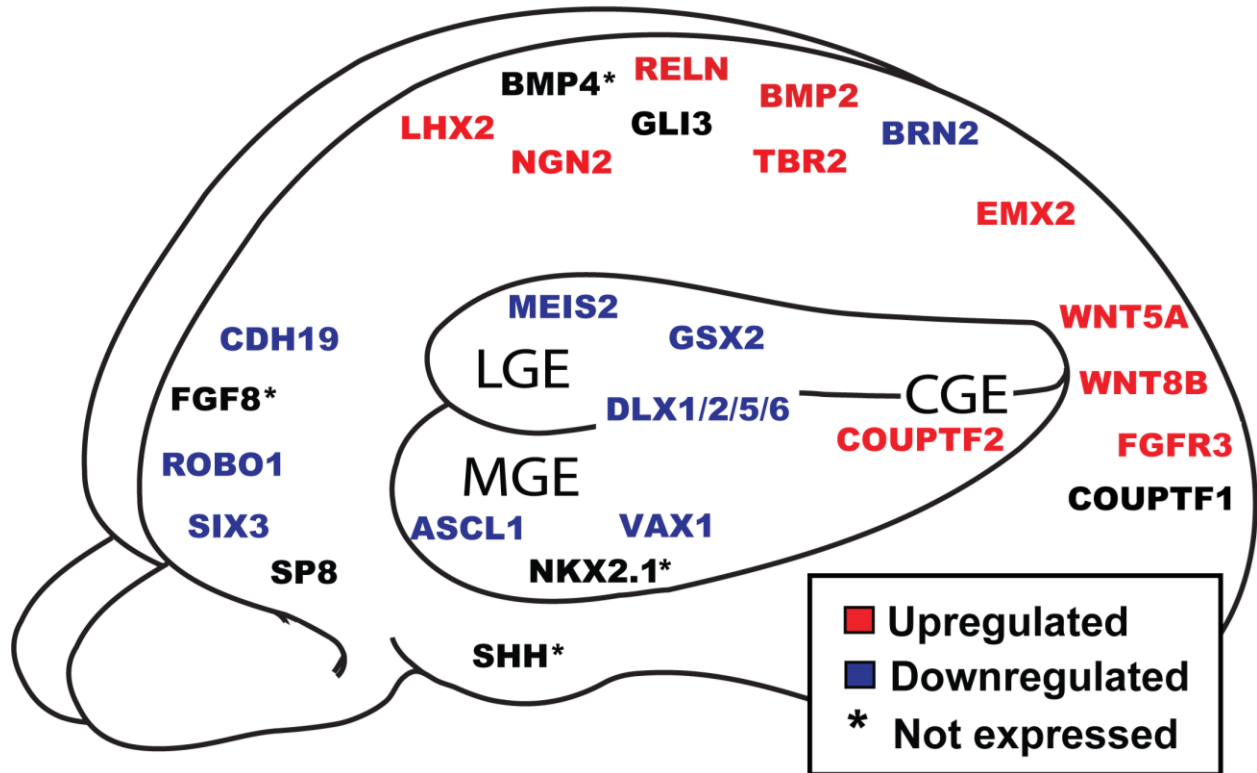

691
